# Supplementary material
Source: Research Square preprint supplement (doi:10.21203/rs.3.rs-10157652/v1)
Supplement: Supplementary file 1 [file 9f3676591933fec039b32973.docx]

**Table 1:** Hematological parameters, urine analysis, and peripheral blood smear findings of the patient at presentation.
